# Supplementary material
Source: publisher site journal article supplement (https://www.dovepress.com/article/591431)
Supplement: Supplementary file 1 [file 591431%20Revised%20Supplementary%20Materials.docx]

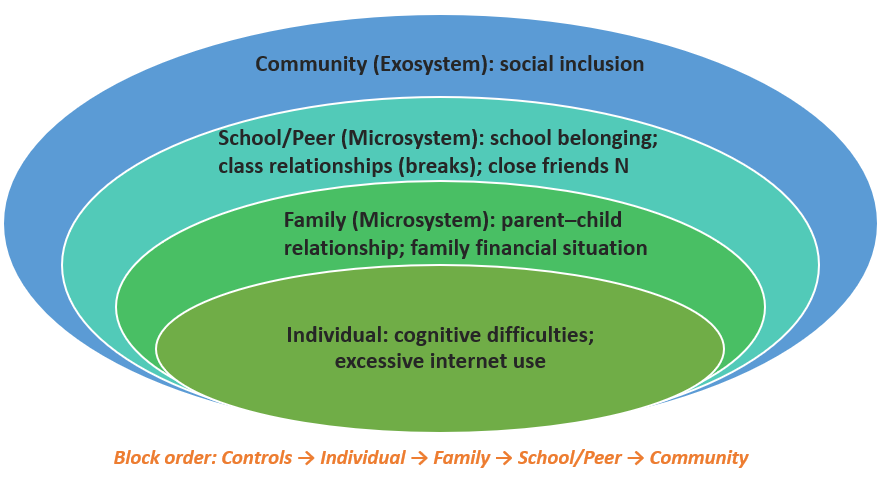


**Supplementary Figure 1 Conceptual Framework and Sequential Analytic Domains**

*Note.* This figure summarizes the conceptual framework used in the study and the sequential domain entry applied in the blockwise OLS regression models. Right arrows (→) indicate the order in which the five analytic domains were entered: demographic background, individual, family, school and peer, and perceived community social inclusion. Arrow direction denotes analytic entry order only and does not imply causal direction or developmental sequence.

| **Supplementary Table 1 Missing Data Patterns by Variable (N = 87,215)** | | | | |
| --- | --- | --- | --- | --- |
| **Variable** | **Valid N** | **Missing N** | **Missing %** | **Rank** |
| Age | 87,103 | 112 | 0.10% | 14 |
| Gender | 87,026 | 189 | 0.20% | 13 |
| School belonging | 86,521 | 694 | 0.80% | 12 |
| Loneliness | 86,221 | 994 | 1.10% | 11 |
| Recess experiences | 85,920 | 1,295 | 1.50% | 9 |
| Number of close friends | 85,920 | 1,295 | 1.50% | 9 |
| Cognitive difficulties | 85,164 | 2,051 | 2.40% | 8 |
| Depressive symptoms (BDI-6) | 84,631 | 2,584 | 3.00% | 6 |
| Anxiety symptoms (GAD-7) | 84,611 | 2,604 | 3.00% | 7 |
| Parent-child relationship | 83,403 | 3,812 | 4.40% | 5 |
| Family financial situation | 82,840 | 4,375 | 5.00% | 4 |
| Life satisfaction | 82,767 | 4,448 | 5.10% | 3 |
| Excessive internet use | 80,319 | 6,896 | 7.90% | 2 |
| Social inclusion (ESIS) | 79,354 | 7,861 | 9.00% | 1 |
| Complete on all variables | 69,800 | 17,415 | 20.00% | — |
| *Note.* Missing % calculated as proportion of total initial sample (N = 87,215). Variables ranked by missing rate from lowest (Rank 14) to highest (Rank 1). | | | | |

| **Supplementary Table 2 Primary Missing Data Patterns (N = 87,215)** | | | | |
| --- | --- | --- | --- | --- |
| **Pattern** | **N** | **%** | **Variables with Missing Data** | **Description** |
| 1 | 69,800 | 80.00% | None | Complete data |
| 2 | 2,373 | 2.70% | Social inclusion only | Single-variable missingness |
| 3 | 2,109 | 2.40% | Parent relationship, Family finances, Life satisfaction, Internet use, Social inclusion | Systematic cluster missingness |
| 4 | 1,727 | 2.00% | Life satisfaction only | Single-variable missingness |
| 5 | 1,295 | 1.50% | Anxiety (GAD-7) only | Single-variable missingness |
| 6 | 1,193 | 1.40% | Depression (BDI-6) only | Single-variable missingness |
| 7 | 1,008 | 1.20% | Cognitive difficulties only | Single-variable missingness |
| Other | 7,710 | 8.80% | Various combinations | Multiple smaller patterns |
| *Note.* Patterns displayed account for 91.2% of the sample. Pattern 3 suggests systematic survey administration differences or participant refusal clusters. Little's MCAR test: χ²(4421) = 9995.99, p < .001, indicating data are not missing completely at random. | | | | |

| **Supplementary Table 3 Comparison of Participants With Complete Versus Incomplete Data** | | | | | |
| --- | --- | --- | --- | --- | --- |
| **Variable** | **Complete (n = 69,800)** | **Incomplete (n = 17,415)** |  |  |  |
|  | M (SD) | M (SD) | t | p | Cohen's d |
| **Mental health outcomes** |  |  |  |  |  |
| Depressive symptoms (BDI-6, 0-18) | 2.32 (3.39) | 2.63 (3.96) | 9.87 | <.001 | 0.09 |
| Anxiety symptoms (GAD-7, 0-21) | 4.09 (4.80) | 4.02 (5.21) | -1.71 | 0.088 | -0.02 |
| Loneliness (0-4) | 1.18 (1.03) | 1.12 (1.11) | -6.13 | <.001 | -0.05 |
| Life satisfaction (1-5) | 3.95 (0.95) | 3.94 (1.03) | -1.65 | 0.1 | -0.02 |
| **Demographics** |  |  |  |  |  |
| Age (years) | 15.54 (0.58) | 15.54 (0.68) | 1.21 | 0.228 | 0.01 |
| Gender (% boys) | 39.50% | 60.50% | χ²(1) = 1064.62 | <.001 | φ = .11 |
| *Note.* Complete = participants with valid data on all 14 study variables. Incomplete = participants missing data on one or more variables. Cohen's d interpreted as: 0.20 = small, 0.50 = medium, 0.80 = large effect. Positive d indicates higher scores in complete group. Boys were significantly overrepresented in the incomplete group (60.5% vs 39.5%). | | | | | |

| **Supplementary Table 4 Exploratory Cross-Level Moderation Analyses: Protective Factors Buffering Cognitive Difficulties** | | | | | | | | | |
| --- | --- | --- | --- | --- | --- | --- | --- | --- | --- |
|  | **Outcome** | **Model 5 R²** | **Model 6 R²** | **ΔR²** | **F change** | **p** | **β (interaction)** | B | **95% CI** |
| **Social Inclusion × Cognitive Difficulties** | | | | | | | | |  |
|  | Depressive symptoms | 0.519 | 0.538 | 0.019 | 2799.817 | <.001 | 0.152*** | -0.006 | [-.006, -.006] |
|  | Anxiety symptoms | 0.460 | 0.465 | 0.005 | 695.584 | <.001 | -0.082*** | -0.004 | [-.005, -.004] |
|  | Loneliness | 0.413 | 0.413 | 0.000 | 0.012 | 0.913 | 0.000 | 0.000 | [.000, .000] |
|  | Life satisfaction | 0.518 | 0.518 | 0.001 | 75.578 | <.001 | 0.026*** | 0.000 | [.000, .000] |
| **School Belonging × Cognitive Difficulties** | | | | | | | | |  |
|  | Depressive symptoms | 0.519 | 0.533 | 0.014 | 2073.060 | <.001 | -.128*** | -0.117 | [-.122, -.112] |
|  | Anxiety symptoms | 0.460 | 0.464 | 0.004 | 551.907 | <.001 | -0.071*** | -0.092 | [-.099, -.084] |
|  | Loneliness | 0.413 | 0.413 | 0.000 | 0.973 | 0.324 | -0.003 | -0.001 | [-.003, .001] |
|  | Life satisfaction | 0.518 | 0.518 | 0.000 | 42.881 | <.001 | 0.019** | 0.005 | [.003, .006] |
| **Parent-Child Relationship × Cognitive Difficulties** | | | | | | | | |  |
|  | Depressive symptoms | 0.519 | 0.530 | 0.011 | 1566.501 | <.001 | -0.110*** | -0.113 | [-.118, -.107] |
|  | Anxiety symptoms | 0.460 | 0.462 | 0.003 | 377.627 | <.001 | -0.058*** | -0.084 | [-.092, -.075] |
|  | Loneliness | 0.413 | 0.413 | 0.000 | 2.603 | 0.107 | 0.005 | 0.002 | [.000, .003] |
|  | Life satisfaction | 0.518 | 0.518 | 0.000 | 33.017 | <.001 | 0.016*** | 0.005 | [.003, .006] |
| Note. N = 69,800. B = unstandardized regression coefficient; β = standardized regression coefficient. 95% CI refers to the confidence interval for B. VIF < 2.0 for all predictors. **p < .01. ***p < .001. | | | | | | | | | |

| **Supplementary Table 5 Correlations Among Study Variables** | | | | | | | | | | | | | |
| --- | --- | --- | --- | --- | --- | --- | --- | --- | --- | --- | --- | --- | --- |
| **Variable** | **1** | **2** | **3** | **4** | **5** | **6** | **7** | **8** | **9** | **10** | **11** | **12** | **13** |
| 1. Depressive symptoms | — |  |  |  |  |  |  |  |  |  |  |  |  |
| 2. Anxiety | 0.72 | — |  |  |  |  |  |  |  |  |  |  |  |
| 3. Loneliness | 0.56 | 0.50 | — |  |  |  |  |  |  |  |  |  |  |
| 4. Life satisfaction | -0.68 | -0.56 | -0.54 | — |  |  |  |  |  |  |  |  |  |
| 5. Cognitive difficulties | 0.58 | 0.58 | 0.43 | -0.46 | — |  |  |  |  |  |  |  |  |
| 6. Excessive internet use | 0.25 | 0.26 | 0.21 | -0.20 | 0.29 | — |  |  |  |  |  |  |  |
| 7. Parent-child relationship | -0.44 | -0.37 | -0.34 | 0.47 | -0.36 | -0.21 | — |  |  |  |  |  |  |
| 8. Family financial situation | -0.29 | -0.26 | -0.27 | 0.36 | -0.29 | -0.11 | 0.27 | — |  |  |  |  |  |
| 9. School belonging | -0.42 | -0.35 | -0.39 | 0.42 | -0.38 | -0.10 | 0.30 | 0.23 | — |  |  |  |  |
| 10. Recess experiences | -0.27 | -0.22 | -0.34 | 0.21 | -0.25 | -0.18 | 0.15 | 0.13 | 0.62 | — |  |  |  |
| 11. Number of close friends | -0.24 | -0.18 | -0.35 | 0.26 | -0.24 | -0.06 | 0.21 | 0.16 | 0.27 | 0.22 | — |  |  |
| 12. Social inclusion | -0.61 | -0.49 | -0.48 | 0.67 | -0.50 | -0.15 | 0.49 | 0.34 | 0.52 | 0.21 | 0.29 | — |  |
| 13. Age | 0.04 | 0.06 | 0.04 | -0.02 | 0.04 | 0.02 | -0.03 | 0.04 | 0.00 | -0.01 | -0.04 | -0.03 | — |
| 14. Gender (Boy) | -0.14 | -0.23 | -0.20 | 0.14 | -0.12 | 0.13 | 0.17 | 0.10 | 0.16 | 0.13 | 0.22 | 0.16 | 0.03 |
| *Note.* All correlations ≥ |.01| are significant at p < .001 (two-tailed) given the large sample*.* | | | | | | | | | | | | | |
